# Supplementary figures and images for: ‘Clickable’ ZnO nanocrystals: the superiority of a novel organometallic approach over the inorganic sol–gel procedure
Source: Royal Society of Chemistry journal article supplement (doi:10.1039/c6cc01430e), 2016-01-01

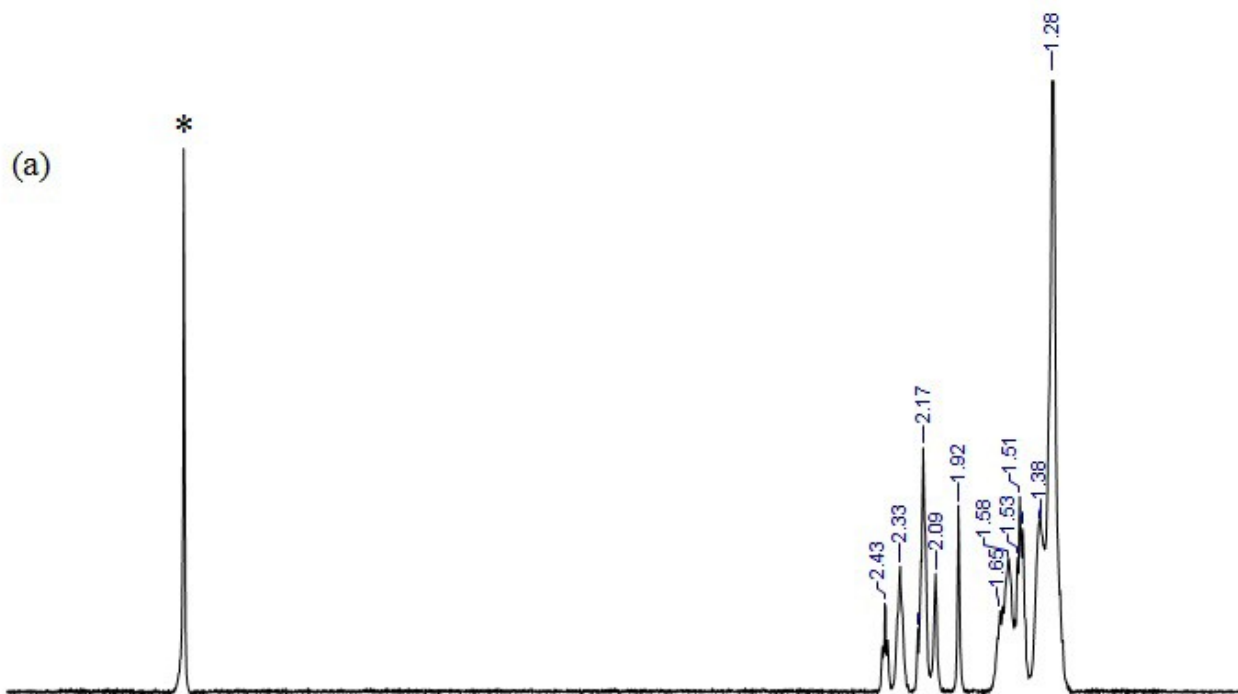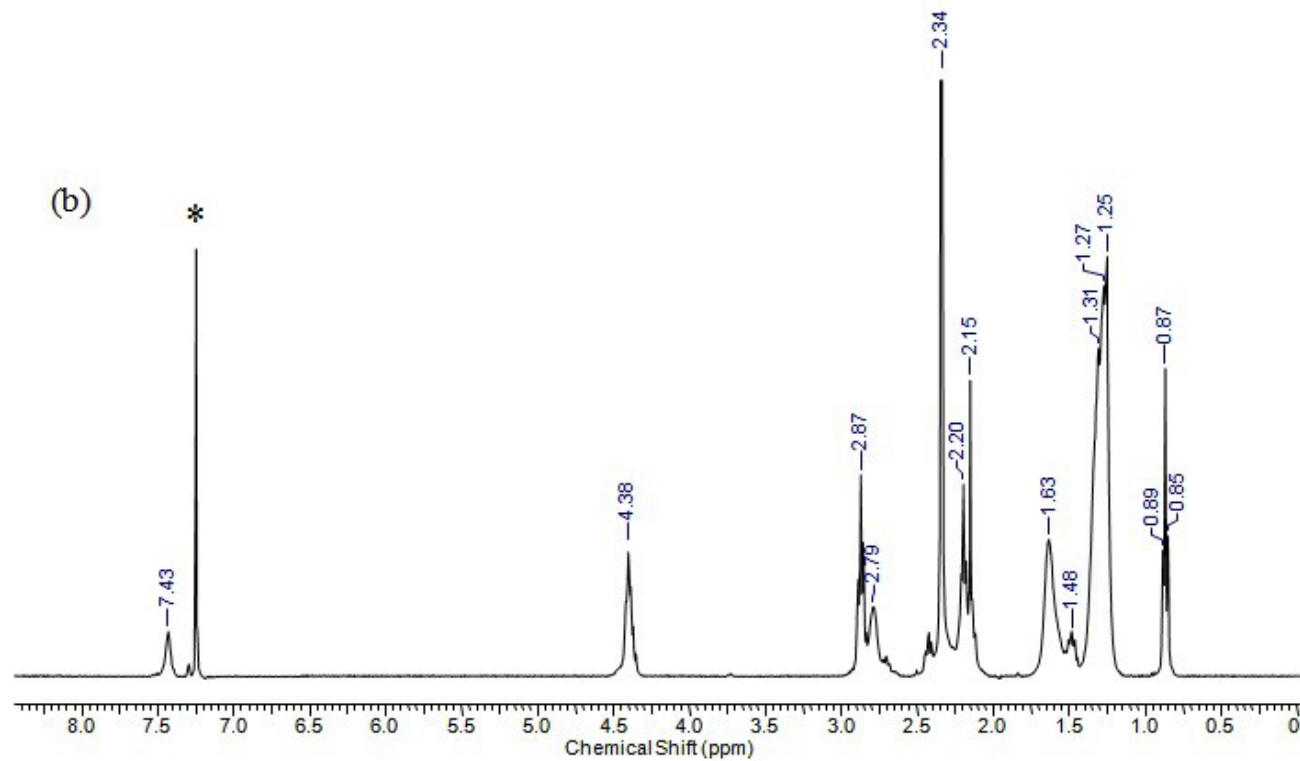

Supplement: c6cc01430e1.pdf [file c6cc01430e1.pdf]
